# Supplementary material for: Translational control of PML contributes to TNFα-induced apoptosis of MCF7 breast cancer cells and decreased angiogenesis in HUVECs
Source: PubMed Central journal article supplement — Cell Death Differ. 2015 Sep 18;23(3):469–83. doi: 10.1038/cdd.2015.114 (PMC5072441; doi:10.1038/cdd.2015.114), 2015-09-18
Supplement: cdd2015114x2.pdf [file cdd2015114x2.pdf]

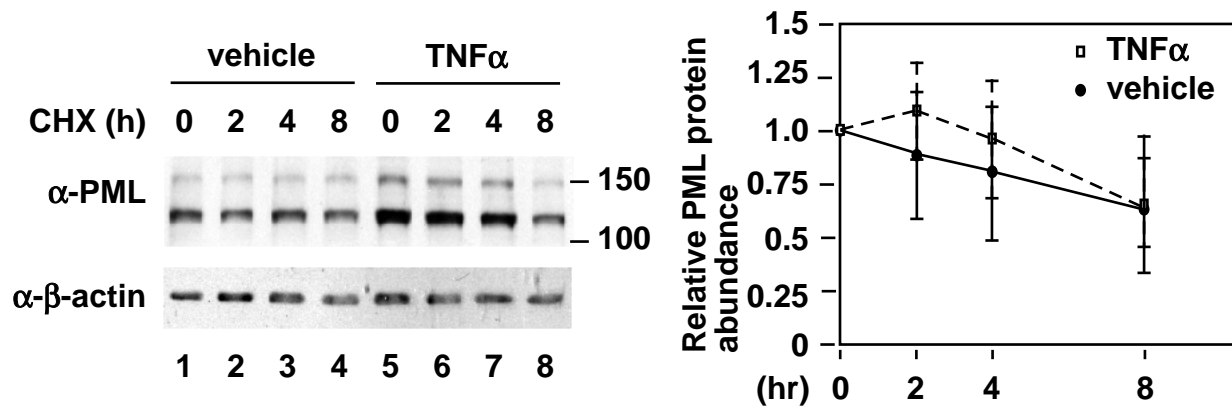

**Fig. S1**

Draq5: DNA  
PML  
DPI: ER

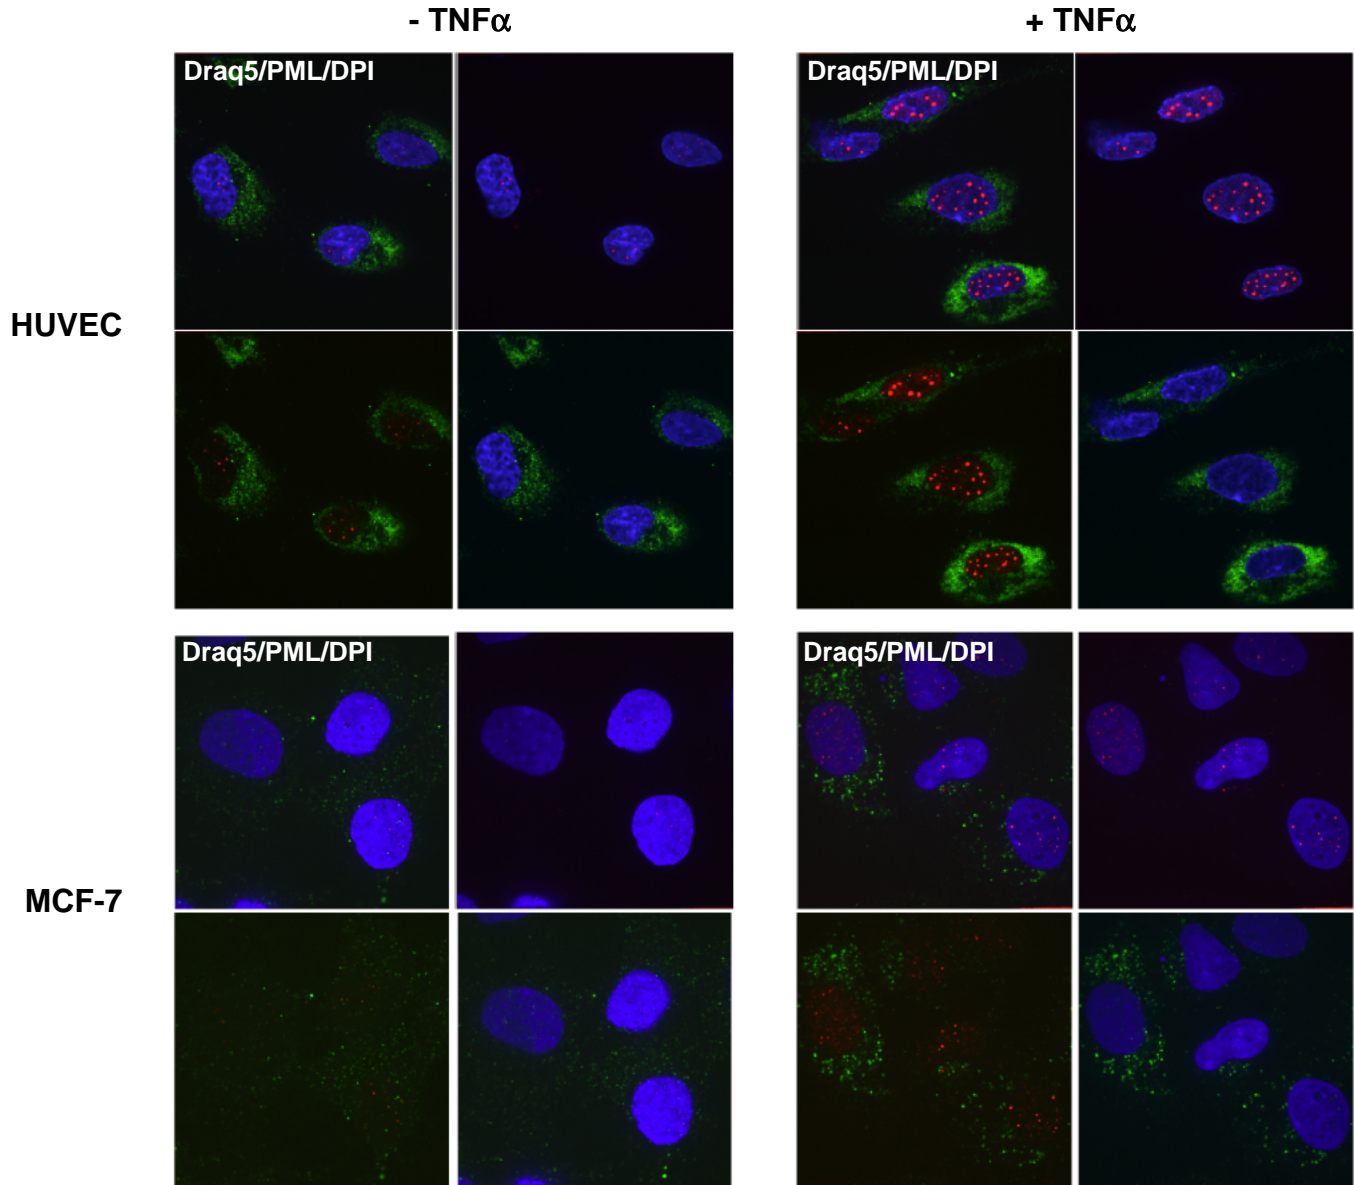

**Fig. S2**

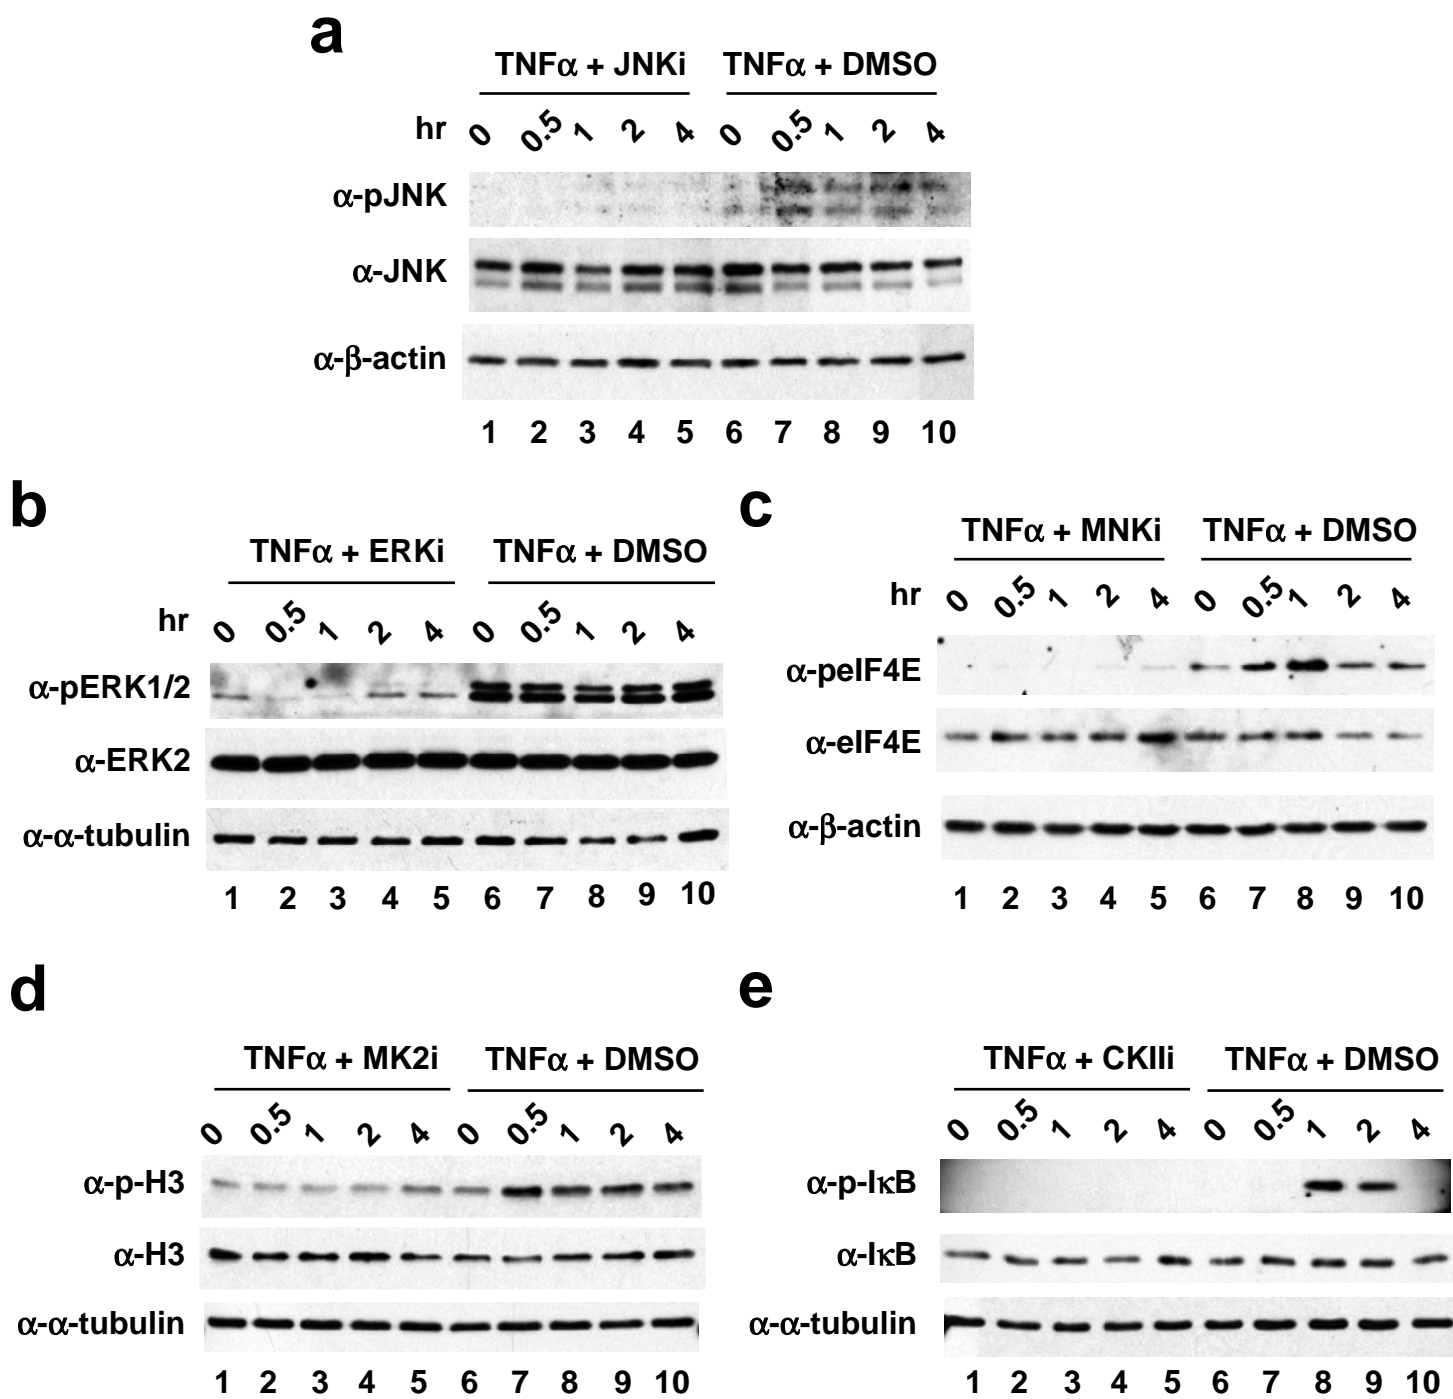

**Fig. S3**

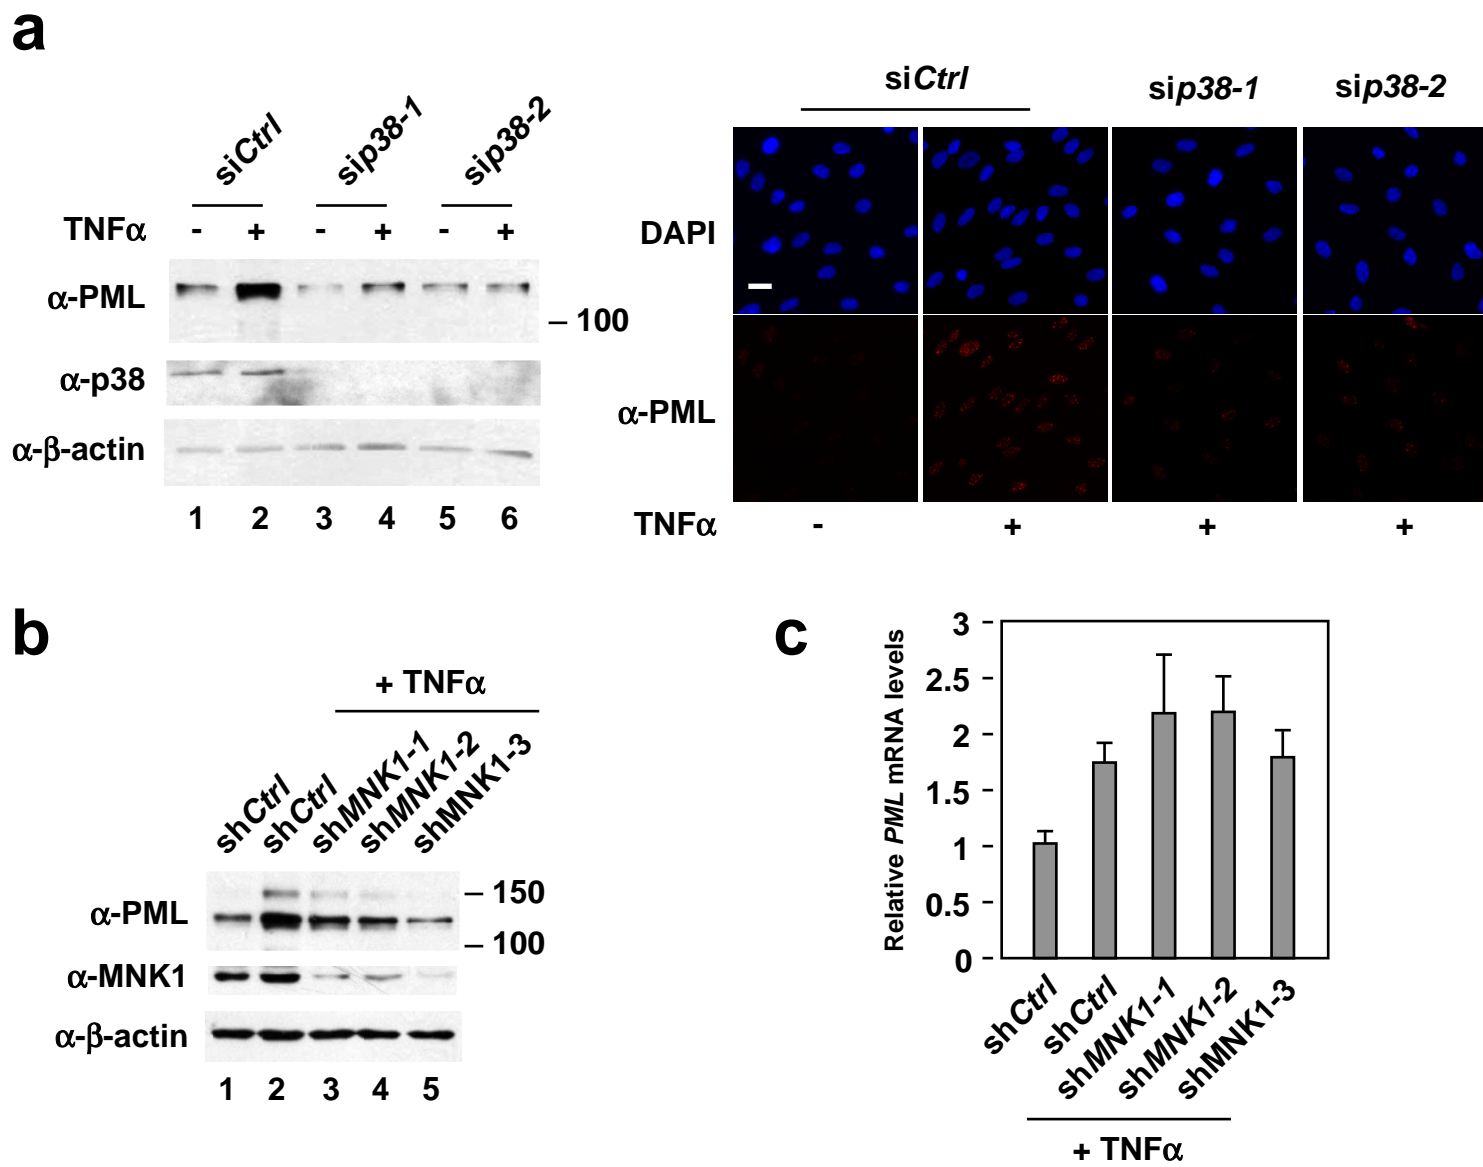

**Fig. S4**

**a**

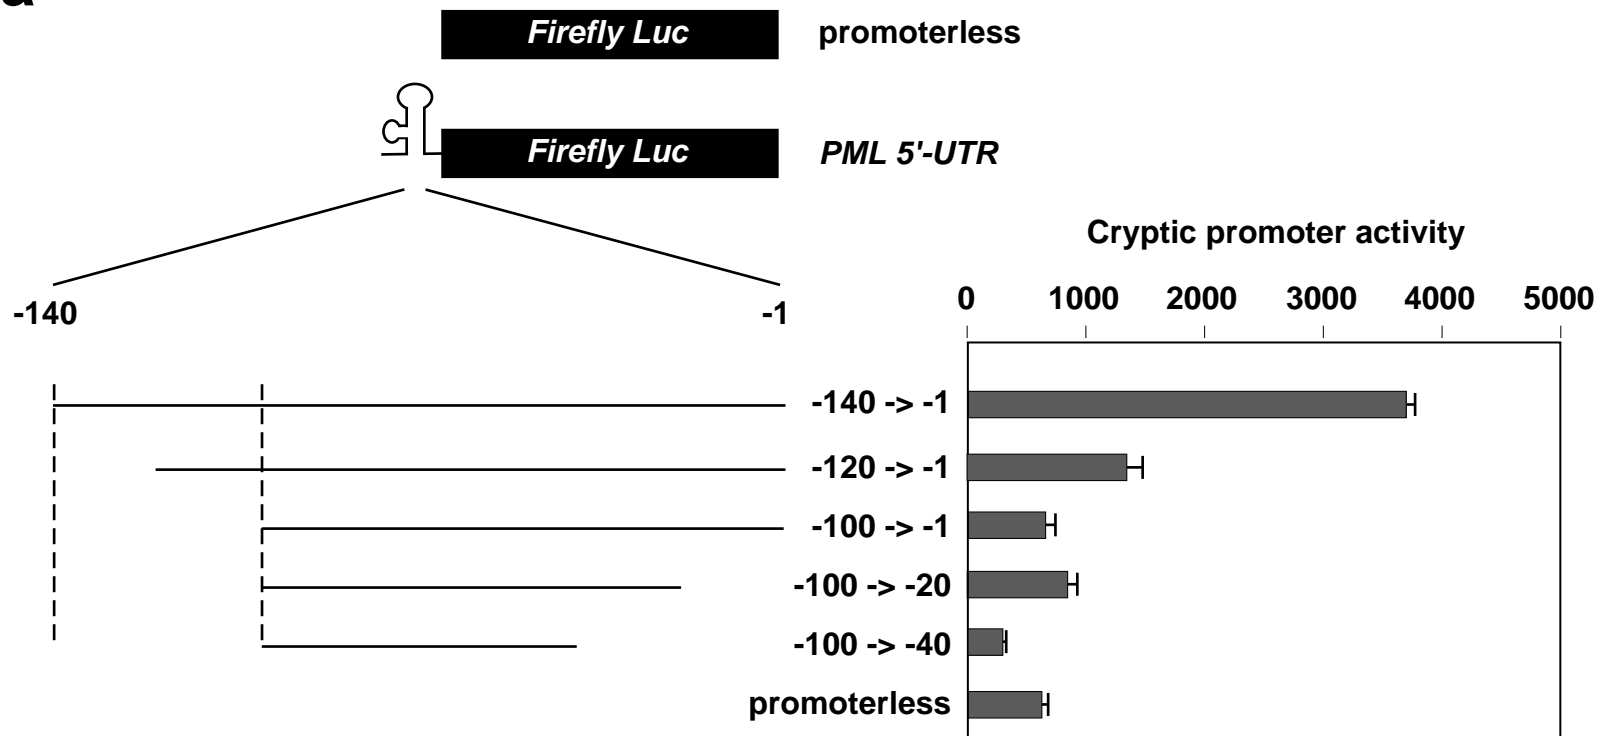

**Fig. S5**

**b** *Firefly Luc* promoterless

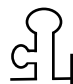

*Firefly Luc* PML 5'-UTR

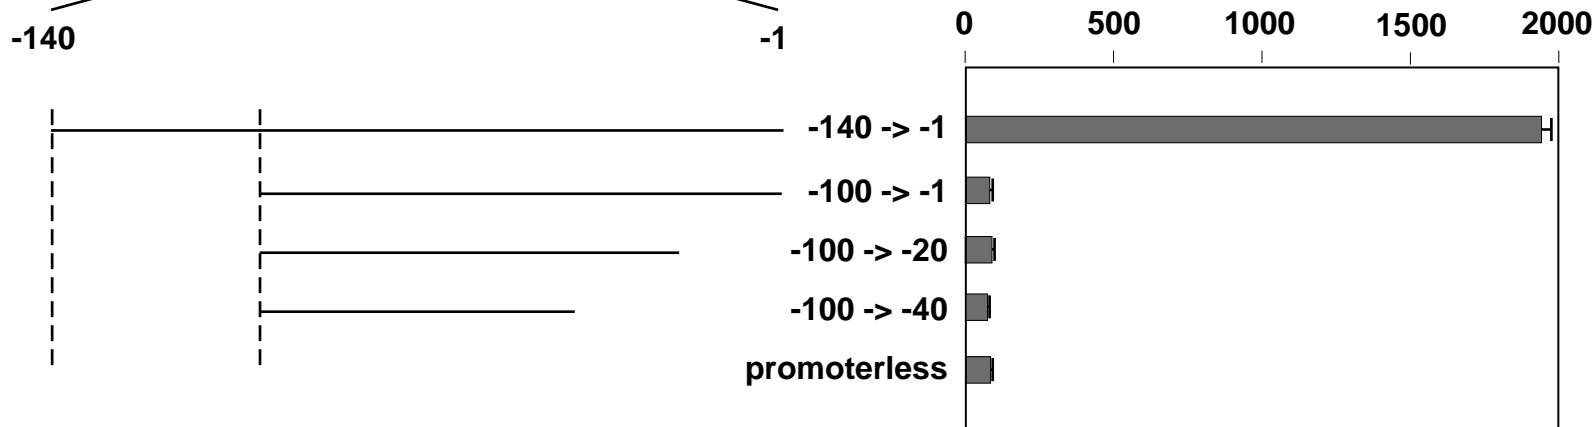

**Fig. S5**

**C**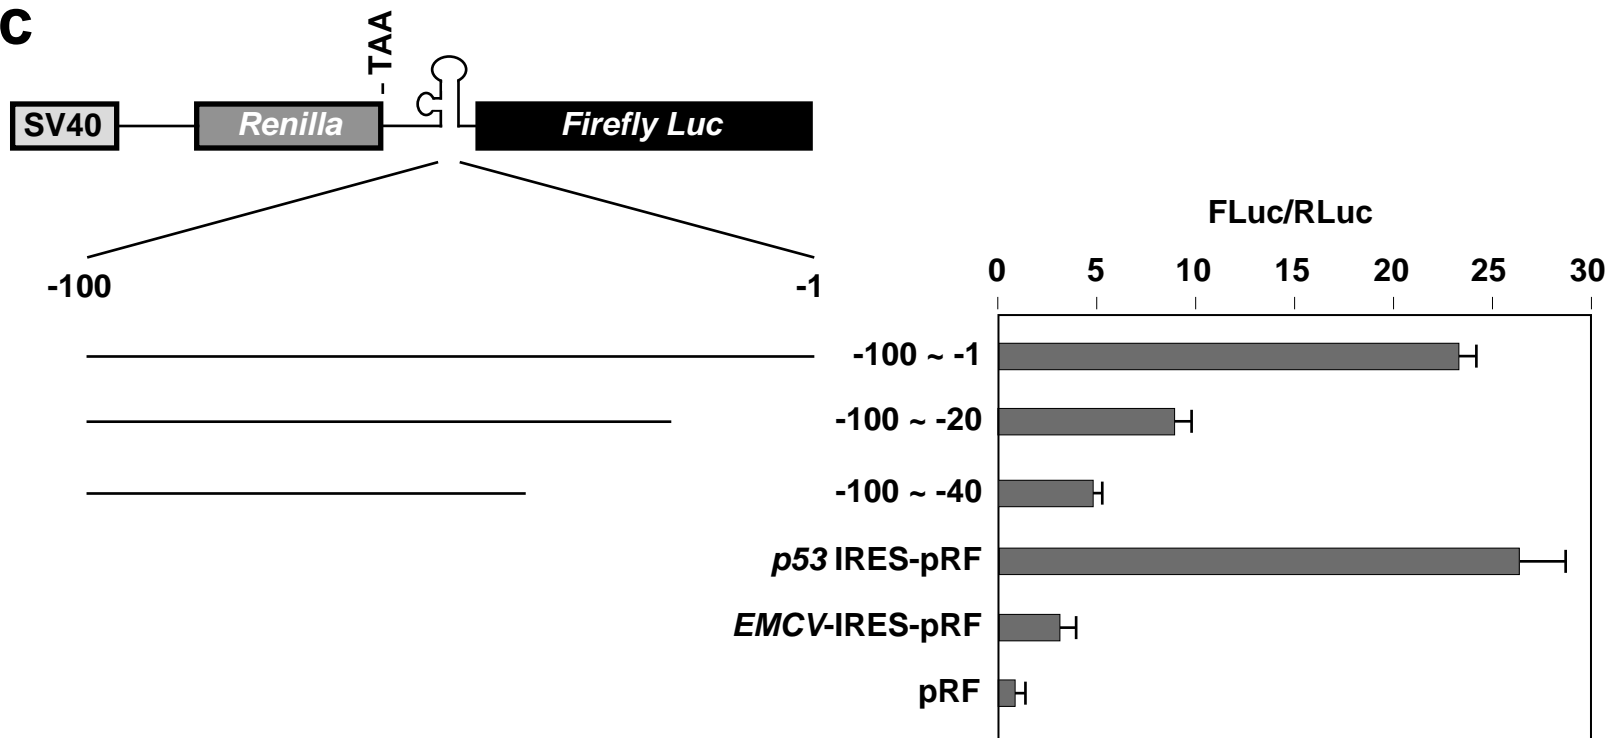**Fig. S5**

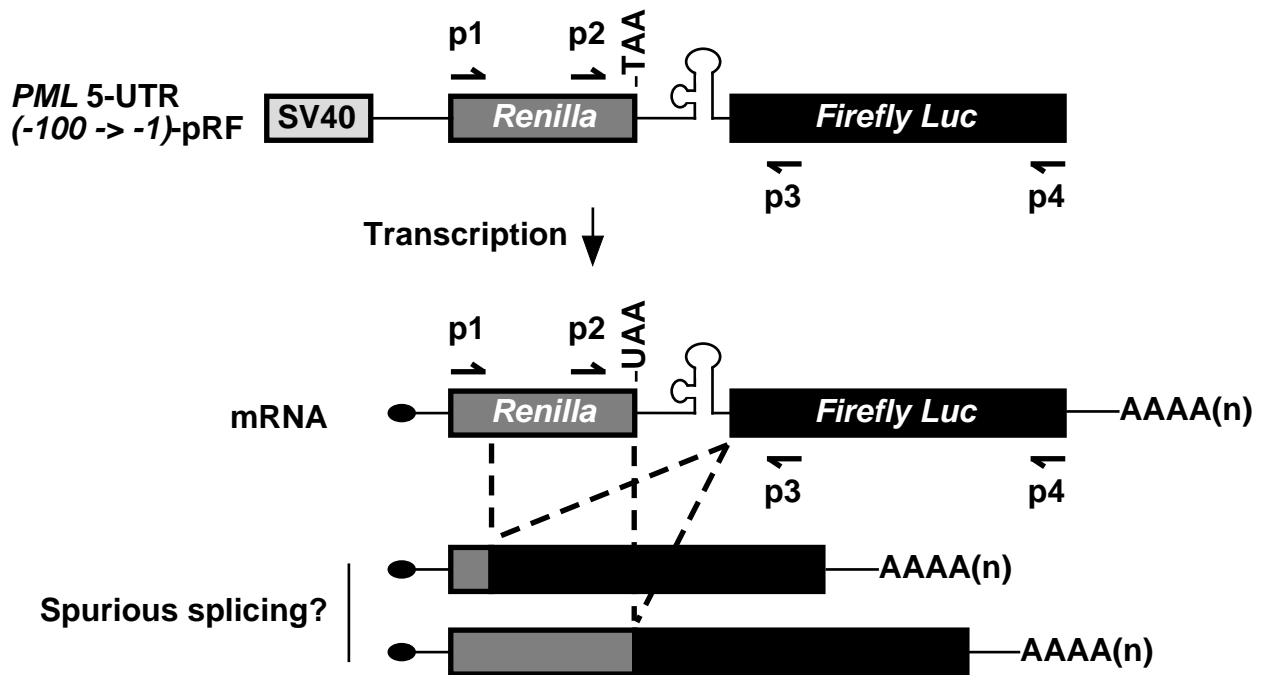

**Fig. S6**



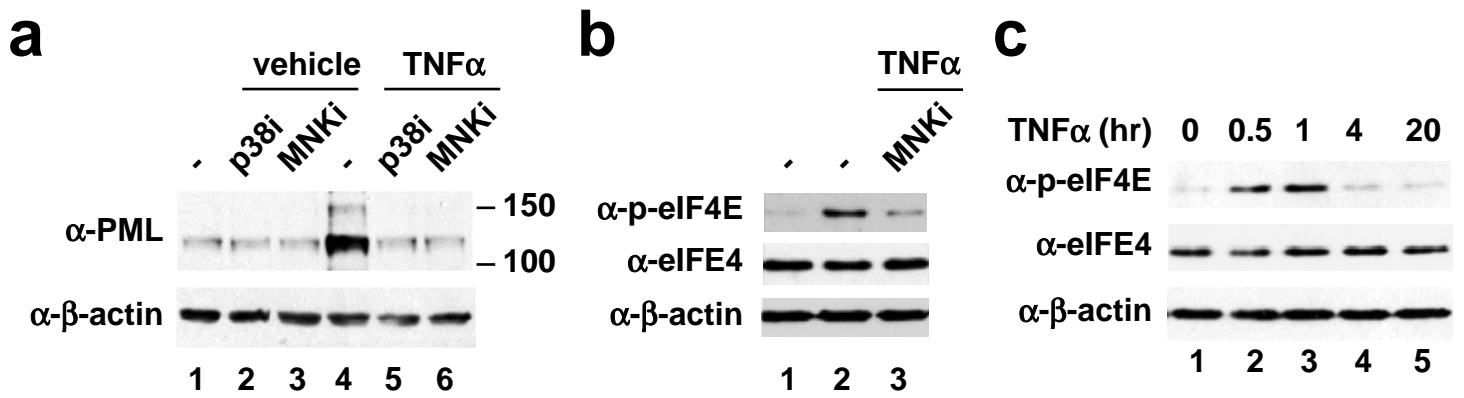

**Fig. S7**

**A**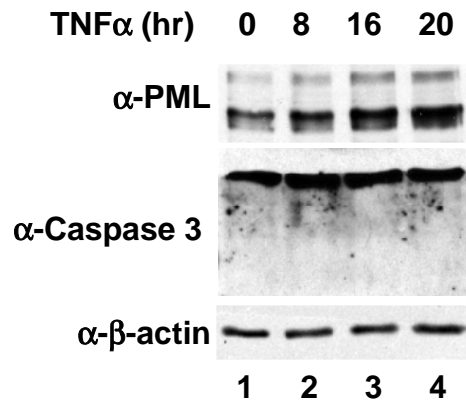**B**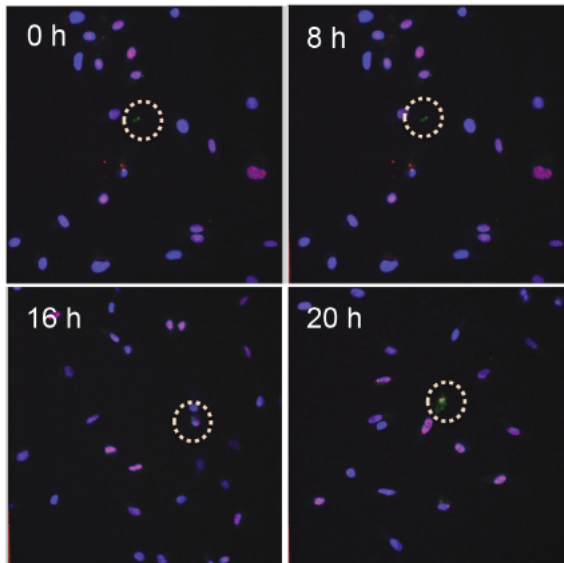

|                | TNF $\alpha$ 0 h | TNF $\alpha$ 8 h | TNF $\alpha$ 16 h | TNF $\alpha$ 24 h |
|----------------|------------------|------------------|-------------------|-------------------|
| Apoptosis (%)  | 4.2 $\pm$ 2.3    | 3.3 $\pm$ 2.5    | 5.4 $\pm$ 3.4     | 3.7 $\pm$ 2.6     |
| <i>P</i> value |                  | 0.57 (N.S.)      | 0.43 (N.S.)       | 0.63 (N.S.)       |

**C**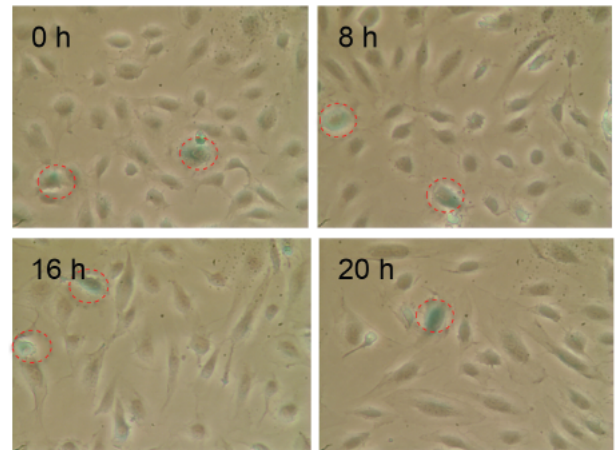

|                | TNF $\alpha$ 0 h | TNF $\alpha$ 8 h | TNF $\alpha$ 16 h | TNF $\alpha$ 24 h |
|----------------|------------------|------------------|-------------------|-------------------|
| X-gal (%)      | 3.2 $\pm$ 1.9    | 2.7 $\pm$ 1.4    | 3.7 $\pm$ 2.3     | 3.5 $\pm$ 1.9     |
| <i>P</i> value |                  | 0.39 (N.S.)      | 0.62 (N.S.)       | 0.7 (N.S.)        |

**Fig. S8**

**a**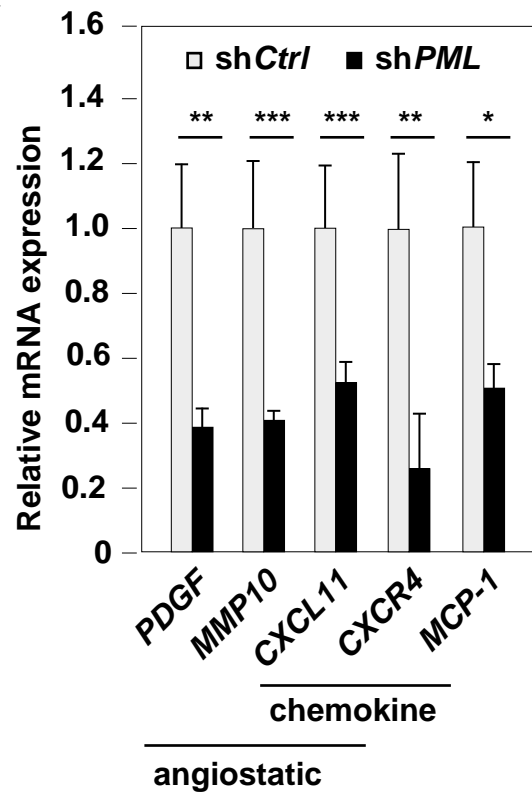**b**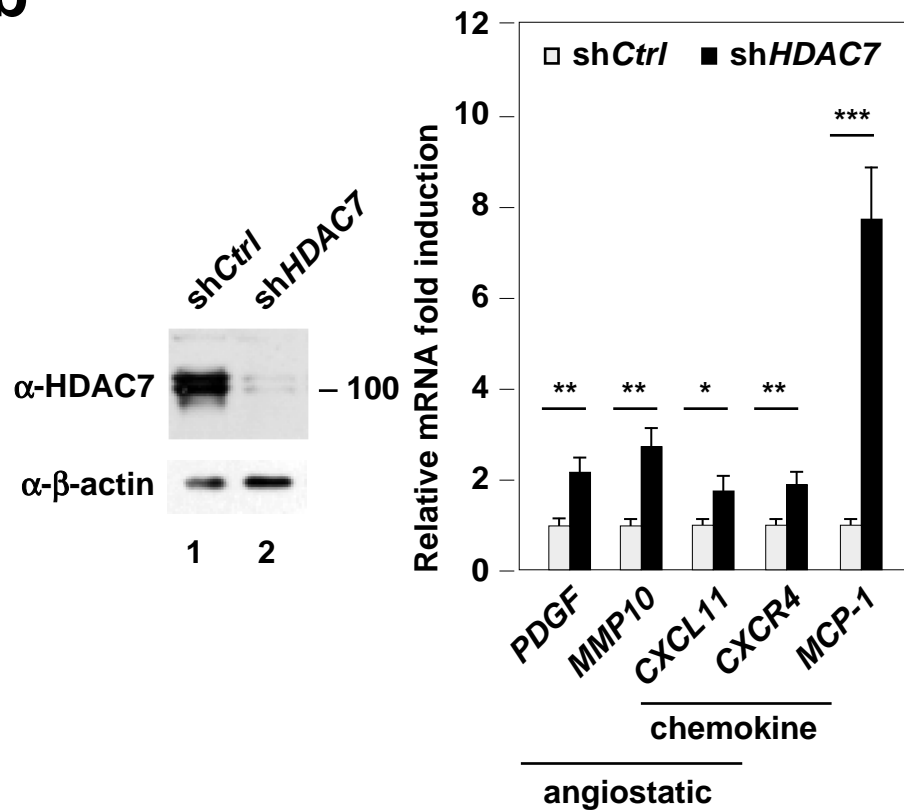**Fig. S9**

**a**

|            |      |                          |                  |             |                     |                    |                |
|------------|------|--------------------------|------------------|-------------|---------------------|--------------------|----------------|
|            |      |                          |                  | -120        |                     | -100               |                |
| Human      | -140 | CUCUCCAGAGGCGGG          | CCCUGAGCCGG      | CACCCUC     | CCCUUUC             | GGACAGCUC          | AAGGGACUCAGC   |
| Chimpanzee | -125 | -----                    | CCCUGAGCCGG      | CACCCUC     | CCCUUUC             | GGACAGCUC          | AAGGGGCUCAGC   |
| Dog        | -119 | -----                    | CCCUGAGUGGG      | GCCGU       | CCCUCC              | CACG-GGCUC         | CGGGGACCG--GC  |
| Pig        | -92  | -----                    | -----            | -----       | -----               | -----              | CUCGCGGACUCAGU |
| Mouse      | -96  | -----                    | CCUCUCGGGAGG     | --CGGGCUCUC | -----               | -----              | CUCGGGCAUCUCUC |
|            |      | -80                      |                  | -60         |                     | -40                |                |
| Human      | -80  | CAACUGGCUCACGCCUCC       | CCUUCAGCUUCUCUUC | ACGCAC      | UCCAAGAUCUAAACCGAGA |                    |                |
| Chimpanzee | -80  | CAACUGGCUCACGCCUCC       | CCUUCAGCUUCUCUUC | ACGCAC      | UCCAAGAUCUAAACCGAGA |                    |                |
| Dog        | -78  | GAUCCGGUC                | CCUGCCUCUCGGUUC  | CGCUUCUCUC  | CCCC--CUCAGGCUC     | AAAACCGAGA         |                |
| Pig        | -77  | GCUCUCGC                 | CACGCCUCUGG      | UUCAGCUUCUC | C--CGCC--UCC        | CAGAUCAAAACCGAGA   |                |
| Mouse      | -60  | GCUCAGUUUCUC             | GCUCAGAUCUGAG    | ACCAUUC     | CCGCUCU             | CACAGACCUAA-UCAAGA |                |
|            |      | -20                      |                  | -1          |                     |                    |                |
| Human      | -21  | AUCGAAACUAAGCUGGGGUCCAUG |                  |             |                     |                    |                |
| Chimpanzee | -21  | AUCGAAACUAAGCUGGGGUCCAUG |                  |             |                     |                    |                |
| Dog        | -21  | AGCGAAACUGUGCUGGGAUCCAUG |                  |             |                     |                    |                |
| Pig        | -21  | AACGAAACUCGCGUGGAUCCAUG  |                  |             |                     |                    |                |
| Mouse      | -1   | AAUG-----                |                  |             |                     |                    |                |

**b**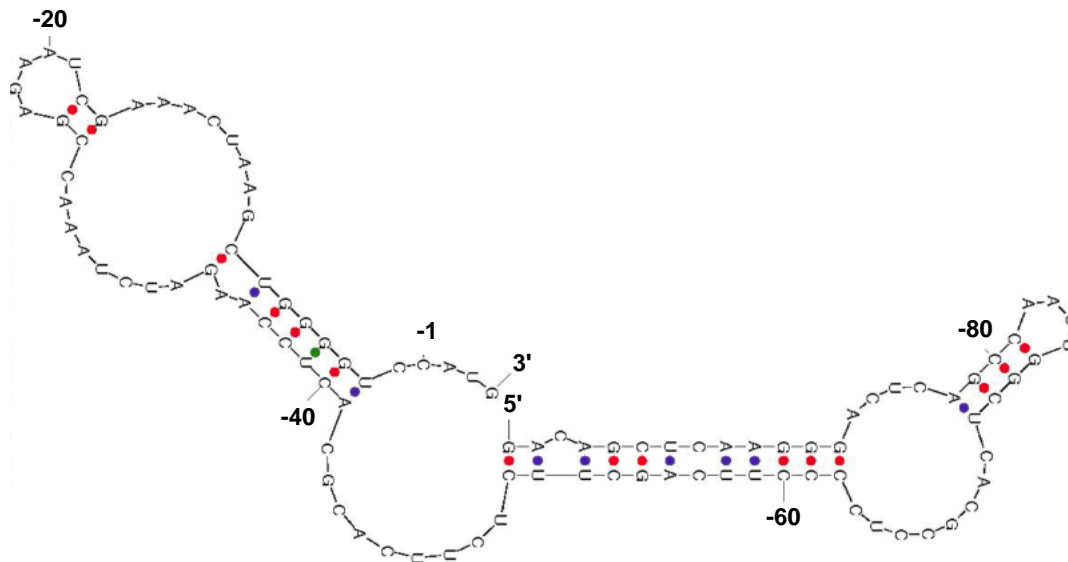**Fig. S10**

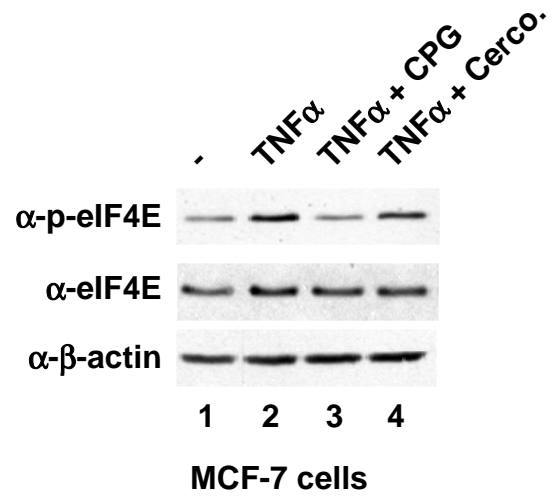

**Fig. S11**
